# Supplementary material for: Modeling of ACTN4-Based Podocytopathy Using Drosophila Nephrocytes
Source: PubMed Central journal article supplement (PMC9939316; doi:10.1016/j.ekir.2022.10.024), 2022-10-31
Supplement: mmc1.pdf [file mmc1.pdf]

## Supplementary Material

### Supplementary Methods:

#### Molecular cloning

Human ACTN4 wildtype plasmids were already available from <sup>1</sup>. Site-directed mutagenesis to clone hACTN4-W59R, -M240T, and -K255E was performed according to standard protocols using hACTN4-WT in a modified pENT1A vector (Invitrogen). For transient transfection of HEK293T cells, the constructs were subcloned into a modified pcDNA6 vector (Invitrogen) containing an N-terminal Flag-tag. Generation of human podocyte cell lines, which stably express Flag-tagged hACTN4-WT or ACTN4-M40T, or transgenic *Drosophila* fly lines expressing HA-tagged hACTN4 variants under UAS control was achieved by recombining the constructs into pLenti6.3 (Invitrogen) or pTHW (*Drosophila* Genomics Resource Centre), respectively, using standard GATEWAY technology protocols. All plasmids were verified by sequencing.

#### Cell culture

HEK293T cells were kept in Dulbecco's modified Eagle's medium supplemented with 10 % fetal bovine serum (FBS). Transient transfection of the cells was achieved using standard calcium-phosphate transfection protocols, adding pcDNA6-GFP as a transfection control. HEK293T cells were also utilized for the production of lentivirus using the pLenti6.3 system. Change to regular podocyte growth medium with 20 mM HEPES was done after 8 hours. Virus containing medium was finally collected after 72 hours, filtered, and stored at 4 °C. For stable expression of human ACTN4 variants in podocyte cell culture, a previously described immortalized human podocyte cell line <sup>2</sup> was used. Cells were cultivated in RPMI 1640 medium supplemented with 10 % FBS as well as insulin-transferrin supplement. They were transduced with lentivirus for 24 hours adding polybrene under growth conditions, before performing medium changes every 24 hours. For selection purposes, blasticidin (1 µg/ml) was added to the medium 48 hours after transduction. Cells were used for further experiments after 96 hours.

#### Western Blot analysis

For western blot analysis, equal amounts of protein were separated by SDS-PAGE and blotted onto a PVDF membrane using semi-dry transfer methods. After blocking in 5 % BSA for 30 minutes and three washing steps in 1x PBS, the membranes were incubated in primary

antibodies in PBS-T (0.1 % Tween in 1x PBS) overnight at 4 °C. The following primary antibodies were used: Mouse anti-Flag (Sigma F1804, 1:10000) and rabbit anti-pan-actin (Cell Signaling #8456). After three washing steps, membranes were incubated in secondary antibodies coupled to horseradish peroxidase (goat anti-mouse, Jackson #115-035-003, goat anti-rabbit, Jackson #111-035-003, 1:15000) or fluorescent secondary antibodies (IRDye 800CW Goat anti-Mouse, LI-COR #926-32210), followed by three further washing steps. Visualization was performed using the FUSION or LI-COR detection systems, respectively.

### **Immunofluorescence of cultured cells**

After splitting the human podocyte cell line onto coverslips and growth to a confluency of about 60 % (24 hours), cells were washed in PBS and fixed in 4 % PFA for 15 minutes at room temperature. After several washing steps and blocking in 5 % normal donkey serum in PBS containing 0.1 % Triton-X for 1 hour, the samples were incubated in primary antibody (mouse anti-Flag, Sigma F1804, 1:1000) overnight at 4 °C. Incubation with secondary antibody (goat anti-mouse 488, Jackson #115-545-003, 1:500) and Phalloidin-Alexa647 (Dyomics, 647P1-33, 1:250) was performed at room temperature for 1 hour. The coverslips were finally mounted in ProLong Diamond + DAPI (Thermofisher, P36971).

Supplementary Figure S1:

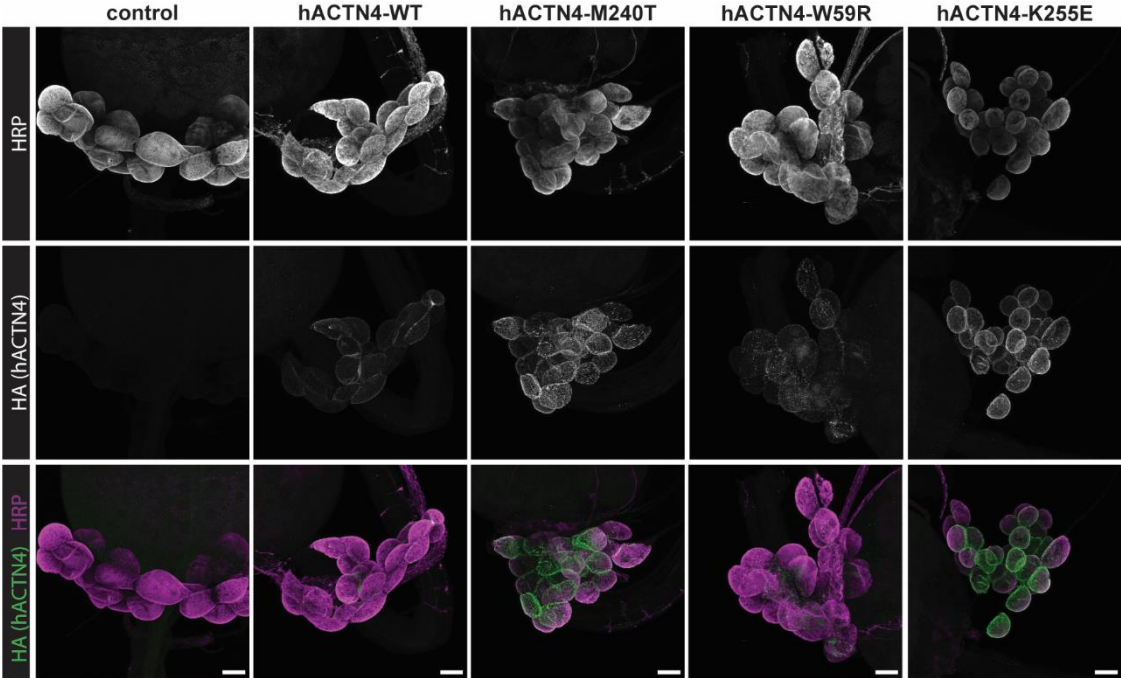

Supplementary Figure S1: Validation of protein expression of hACTN4-variants in *Drosophila* nephrocytes. Immunofluorescence analysis of nephrocytes expressing HA-tagged hACTN4-variants under UAS-control. Nephrocytes were stained with anti-HRP (nephrocyte membrane) and anti-HA (detecting HA-tag of hACTN4-variants). Scale bar indicates 25  $\mu$ m.

**Supplementary Table S1:**

| <b>Patient Number</b>      | <b>1</b>                                                                                                                                                         | <b>2</b>                                                                                 | <b>3</b>                                                                                                                                                                                    |
|----------------------------|------------------------------------------------------------------------------------------------------------------------------------------------------------------|------------------------------------------------------------------------------------------|---------------------------------------------------------------------------------------------------------------------------------------------------------------------------------------------|
| <b>HGVS cDNA</b>           | c.457T>C                                                                                                                                                         | c.584G>A                                                                                 | c.719T>C                                                                                                                                                                                    |
| <b>HGVS protein</b>        | p.F153L                                                                                                                                                          | p.G195D                                                                                  | p.M240T                                                                                                                                                                                     |
| <b>Mutation type</b>       | missense                                                                                                                                                         | missense                                                                                 | missense                                                                                                                                                                                    |
| <b>ACMG class</b>          | 5                                                                                                                                                                | 4                                                                                        | 4                                                                                                                                                                                           |
| <b>Status</b>              | reported thrice                                                                                                                                                  | reported once                                                                            | novel<br>this study                                                                                                                                                                         |
| <b>Reference</b>           | PMID: 23014460 <sup>3</sup>                                                                                                                                      | PMID: 26740551 <sup>1</sup>                                                              | this study                                                                                                                                                                                  |
| <b>ClinVar</b>             | NA                                                                                                                                                               | 1 submission                                                                             | 2 submissions                                                                                                                                                                               |
| <b>ClinPred prediction</b> | 0.997                                                                                                                                                            | 0.999                                                                                    | 0.998                                                                                                                                                                                       |
| <b>AF gnomAD</b>           | not found                                                                                                                                                        | not found                                                                                | not found                                                                                                                                                                                   |
| <b>Patient course</b>      | Clinical presentation at age 17 with SRNS, KB: FSGS. PR with cyclosporine A (reduction of proteinuria from 15g/d to 6-8g/d), moderate decline in kidney function | Clinical presentation with NS and ESRD at age 13, initiation of PD, L-KTX one year later | Clinical presentation at age 4 with proteinuria, first KB: MCD; persisting proteinuria, second KB: FSGS, PR with cyclosporine A; progression to ESRD and preemptive L-KTX at 9 years of age |

**Supplemental Table S1: *ACNT4* de novo variants identified in pediatric SRNS /FSGS cases.**

Abbreviations: NS, nephrotic syndrome, PD, peritoneal dialysis; L-KTX, living donor kidney transplantation; PR, partial remission; KB, kidney biopsy; MCD, minimal change disease; FSGS, focal segmental glomerulosclerosis

### Supplementary References

1. Bartram MP, Habbig S, Pahmeyer C, et al. Three-layered proteomic characterization of a novel ACTN4 mutation unravels its pathogenic potential in FSGS. *Hum Mol Genet.* 2016;25(6):1152-1164.
2. Saleem MA, O'Hare MJ, Reiser J, et al. A conditionally immortalized human podocyte cell line demonstrating nephrin and podocin expression. *J Am Soc Nephrol.* 2002;13(3):630-638.
3. Barua M, Brown EJ, Charoonratana VT, Genovese G, Sun H, Pollak MR. Mutations in the INF2 gene account for a significant proportion of familial but not sporadic focal and segmental glomerulosclerosis. *Kidney Int.* 2013;83(2):316-322.
